# Supplementary material
Source: ML conference proceedings conference paper supplement (https://proceedings.mlr.press/v215/de-vos23a.html)
Supplement: Supplementary file [file de-vos23a-supp.pdf]

## Appendix A. Proofs

### Proof of Proposition 3

Sufficiency is trivial, as  $\mathcal{F} \subseteq \mathcal{F}_{\text{pr}_{\text{ex}}}$ . For necessity, assume that  $\mathcal{D}$  is exchangeable, so  $\mathcal{D} + \mathcal{F} \subseteq \mathcal{D}$ . Consider any  $\hat{A} \in \mathcal{D}$  and any  $\hat{B} \in \mathcal{F}_{\text{pr}_{\text{ex}}}$ , then we have to show that  $\hat{A} + \hat{B} \in \mathcal{D}$ . Since  $\hat{B} - \text{pr}_{\text{ex}}(\hat{B}) = \hat{B}$ , we find that

$$\hat{B} = \frac{1}{m!} \sum_{\pi \in \mathbb{P}} (\hat{B} - \pi^t \hat{B}) \quad (6)$$

and therefore  $\hat{A} + \hat{B} = \frac{1}{m!} \sum_{\pi \in \mathbb{P}} (\hat{A} + \hat{B} - \pi^t \hat{B})$ . Since  $\hat{A} \in \mathcal{D}$  and  $\hat{B} - \pi^t \hat{B} \in \mathcal{F}$ , we infer from  $\mathcal{D} + \mathcal{F} \subseteq \mathcal{D}$  that  $\hat{A} + \hat{B} - \pi^t \hat{B} \in \mathcal{D}$ , and therefore from **D3** and **D4** that, indeed, also  $\hat{A} + \hat{B} \in \mathcal{D}$ .

For the second statement, we infer from Equation (6) that  $\mathcal{F}_{\text{pr}_{\text{ex}}} \subseteq \text{span}(\mathcal{F})$ . For the converse inequality, observe that for any  $\hat{A} \in \mathcal{H}$  and  $\sigma \in \mathbb{P}$ ,

$$\text{pr}_{\text{ex}}(\hat{A} - \sigma^t \hat{A}) = \frac{1}{m!} \sum_{\pi \in \mathbb{P}} \pi^t \hat{A} - \frac{1}{m!} \sum_{\pi \in \mathbb{P}} \pi^t (\sigma^t \hat{A}) = \hat{0},$$

so  $\mathcal{F} \subseteq \mathcal{F}_{\text{pr}_{\text{ex}}}$ , and therefore also  $\text{span}(\mathcal{F}) \subseteq \mathcal{F}_{\text{pr}_{\text{ex}}}$ . ■

### Proof of Proposition 4

We give a circular proof.

(i)⇒(ii). Assume that there's some exchangeable coherent set of measurements  $\mathcal{D}$  such that  $\underline{\Lambda} = \underline{\Lambda}_{\mathcal{D}}$ , and consider any  $\hat{B} \in \mathcal{F}$ . Then we infer from Proposition 3 and **D2** that  $\hat{B} + \alpha \hat{I} \in \mathcal{D}$  for all real  $\alpha > 0$ , so Equation (1) tells us that  $\underline{\Lambda}_{\mathcal{D}}(\hat{B}) \geq 0$ . Since also  $-\hat{B} \in \mathcal{F}$ , we can use the same argument to infer that also  $\underline{\Lambda}_{\mathcal{D}}(-\hat{B}) \geq 0$ . Using **LP4**, we then find that  $0 \geq -\underline{\Lambda}_{\mathcal{D}}(-\hat{B}) = \underline{\Lambda}_{\mathcal{D}}(\hat{B}) \geq \underline{\Lambda}_{\mathcal{D}}(\hat{B}) \geq 0$ .

(ii)⇒(iii). Consider any  $\hat{A} \in \mathcal{F}_{\text{pr}_{\text{ex}}}$ , then we infer from  $\hat{A} = \hat{A} - \text{pr}_{\text{ex}}(\hat{A}) = \frac{1}{m!} \sum_{\pi \in \mathbb{P}} (\hat{A} - \pi^t \hat{A})$  and from **LP1**, **LP2** and **LP4**, that

$$\begin{aligned} \frac{1}{m!} \sum_{\pi \in \mathbb{P}} \underline{\Lambda}(\hat{A} - \pi^t \hat{A}) &\leq \underline{\Lambda}(\hat{A}) \\ &\leq \overline{\Lambda}(\hat{A}) \leq \frac{1}{m!} \sum_{\pi \in \mathbb{P}} \overline{\Lambda}(\hat{A} - \pi^t \hat{A}), \end{aligned}$$

so we infer from (ii) that, indeed,  $\underline{\Lambda}(\hat{A}) = \overline{\Lambda}(\hat{A}) = 0$ .

(iii)⇒(iv). Consider any  $\hat{A} \in \mathcal{H}$  and infer from  $\hat{A} = \text{pr}_{\text{ex}}(\hat{A}) + (\hat{A} - \text{pr}_{\text{ex}}(\hat{A}))$  and **LP5** that

$$\begin{aligned} \underline{\Lambda}(\text{pr}_{\text{ex}}(\hat{A})) + \underline{\Lambda}(\hat{A} - \text{pr}_{\text{ex}}(\hat{A})) &\leq \underline{\Lambda}(\hat{A}) \\ &\leq \underline{\Lambda}(\text{pr}_{\text{ex}}(\hat{A})) + \overline{\Lambda}(\hat{A} - \text{pr}_{\text{ex}}(\hat{A})). \end{aligned}$$

But,  $\hat{A} - \text{pr}_{\text{ex}}(\hat{A}) \in \mathcal{F}_{\text{pr}_{\text{ex}}}$ , because  $\text{pr}_{\text{ex}}(\hat{A} - \text{pr}_{\text{ex}}(\hat{A})) = \text{pr}_{\text{ex}}(\hat{A}) - \text{pr}_{\text{ex}}(\hat{A}) = \hat{0}$ , so by (iii),  $\underline{\Lambda}(\hat{A} - \text{pr}_{\text{ex}}(\hat{A})) = \overline{\Lambda}(\hat{A} - \text{pr}_{\text{ex}}(\hat{A})) = 0$ .

(iv)⇒(i). Let  $\mathcal{D}_{\underline{\Lambda}}^{\geq} := \{\hat{A} \in \mathcal{H} : \underline{\Lambda}(\hat{A}) > 0\}$  and also let  $\mathcal{D} := \mathcal{D}_{\underline{\Lambda}}^{\geq} + \mathcal{F}_{\text{pr}_{\text{ex}}}$ . The coherence of  $\underline{\Lambda}$  readily implies that  $\mathcal{D}$  satisfies **D2**, **D3** and **D4**. For **D1**, assume towards contradiction that there are  $\hat{A} \in \mathcal{D}_{\underline{\Lambda}}^{\geq}$  and  $\hat{B} \in \mathcal{F}_{\text{pr}_{\text{ex}}}$  such that  $\hat{A} + \hat{B} = \hat{0}$ , so  $\text{pr}_{\text{ex}}(\hat{A}) = \text{pr}_{\text{ex}}(\hat{A} + \hat{B}) = \hat{0}$ . Then **LP4** and (iv) imply that  $0 = \underline{\Lambda}(\text{pr}_{\text{ex}}(\hat{A})) = \underline{\Lambda}(\hat{A})$ , contradicting that  $\hat{A} \in \mathcal{D}_{\underline{\Lambda}}^{\geq}$ . Hence,  $\mathcal{D}$  is coherent. The exchangeability of  $\mathcal{D}$  follows from the fact that  $\mathcal{D} + \mathcal{F}_{\text{pr}_{\text{ex}}} = \mathcal{D}_{\underline{\Lambda}}^{\geq} + \mathcal{F}_{\text{pr}_{\text{ex}}} + \mathcal{F}_{\text{pr}_{\text{ex}}} = \mathcal{D}_{\underline{\Lambda}}^{\geq} + \mathcal{F}_{\text{pr}_{\text{ex}}} = \mathcal{D}$ . We're done if we can prove that  $\underline{\Lambda} = \underline{\Lambda}_{\mathcal{D}}$ . Fix any  $\hat{A} \in \mathcal{H}$ , then  $\hat{A} - \alpha \hat{I} \in \mathcal{D}$  implies that there are  $\hat{B} \in \mathcal{D}_{\underline{\Lambda}}^{\geq}$  and  $\hat{C} \in \mathcal{F}_{\text{pr}_{\text{ex}}}$  such that  $\hat{A} - \alpha \hat{I} = \hat{B} + \hat{C}$ . Observe that (iv) and **LP2** imply that  $\underline{\Lambda}(\hat{C}) = \underline{\Lambda}(\text{pr}_{\text{ex}}(\hat{C})) = \underline{\Lambda}(\hat{0}) = 0$ , and similarly, that  $\overline{\Lambda}(\hat{C}) = -\underline{\Lambda}(-\hat{C}) = -\underline{\Lambda}(\text{pr}_{\text{ex}}(-\hat{C})) = -\underline{\Lambda}(\hat{0}) = 0$ . **LP6** and **LP5** therefore imply that  $\underline{\Lambda}(\hat{A}) = \alpha + \underline{\Lambda}(\hat{B} + \hat{C}) = \alpha + \underline{\Lambda}(\hat{B}) \geq \alpha$ , so  $\underline{\Lambda}_{\mathcal{D}}(\hat{A}) \leq \underline{\Lambda}(\hat{A})$ . Conversely, as  $\mathcal{D}_{\underline{\Lambda}}^{\geq} \subseteq \mathcal{D}$ , we also find that  $\underline{\Lambda}_{\mathcal{D}}(\hat{A}) \geq \underline{\Lambda}_{\mathcal{D}_{\underline{\Lambda}}^{\geq}}(\hat{A})$ . Now, by Equation (1),

$$\begin{aligned} \underline{\Lambda}_{\mathcal{D}_{\underline{\Lambda}}^{\geq}}(\hat{A}) &= \sup\{\alpha \in \mathbb{R} : \hat{A} - \alpha \hat{I} \in \mathcal{D}_{\underline{\Lambda}}^{\geq}\} \\ &= \sup\{\alpha \in \mathbb{R} : \underline{\Lambda}(\hat{A} - \alpha \hat{I}) > 0\} \\ &= \sup\{\alpha \in \mathbb{R} : \underline{\Lambda}(\hat{A}) > \alpha\} = \underline{\Lambda}(\hat{A}), \end{aligned}$$

where the penultimate equality is due to **LP6**. Then  $\underline{\Lambda}_{\mathcal{D}}(\hat{A}) \geq \underline{\Lambda}_{\mathcal{D}_{\underline{\Lambda}}^{\geq}}(\hat{A}) = \underline{\Lambda}(\hat{A}) \geq \underline{\Lambda}_{\mathcal{D}}(\hat{A})$ . ■

### Proof of Corollary 5

First, assume that  $\underline{\Lambda}$  is exchangeable. If we consider any  $\hat{\rho} \in \mathcal{R}_{\underline{\Lambda}}$  and any  $\pi \in \mathbb{P}$ , then we must show that  $\overline{\Lambda}(\hat{\rho}) = \underline{\Lambda}(\hat{\rho})$ . Consider, to this end, any  $\hat{A} \in \mathcal{H}$  and let  $\hat{B} := \hat{A} - \pi^t \hat{A}$ , then Proposition 4(ii) implies that  $\underline{\Lambda}(\hat{B}) = \overline{\Lambda}(\hat{B}) = 0$ . We then infer from Equation (3) applied to  $\hat{B}$  and  $-\hat{B}$  that  $\underline{\Lambda}(\hat{B}) \leq \text{Tr}(\hat{\rho} \hat{B}) \leq \overline{\Lambda}(\hat{B})$ , and therefore  $\text{Tr}(\hat{\rho}(\hat{A} - \pi^t \hat{A})) = 0$ . By the linearity of the trace and Equation (5), we find that

$$\text{Tr}(\hat{\rho} \hat{A}) = \text{Tr}(\hat{\rho}(\pi^t \hat{A})) = \text{Tr}((\overline{\Lambda} \hat{\rho}) \hat{A}).$$

Since  $\hat{A} \in \mathcal{H}$  is arbitrary, Theorem 2 implies that  $\hat{\rho} = \overline{\Lambda} \hat{\rho}$ .

Conversely, assume that all density operators  $\hat{\rho}$  in  $\mathcal{R}_{\underline{\Lambda}}$  are permutation invariant. Consider any  $\hat{A} \in \mathcal{F}_{\text{pr}_{\text{ex}}}$ , then  $\text{pr}_{\text{ex}}(\hat{A}) = \hat{0}$  and therefore, by the linearity of the trace,

$$\begin{aligned} 0 &= \text{Tr}(\hat{\rho} \text{pr}_{\text{ex}}(\hat{A})) = \frac{1}{m!} \sum_{\pi \in \mathbb{P}} \text{Tr}(\hat{\rho}(\pi^t \hat{A})) \\ &= \frac{1}{m!} \sum_{\pi \in \mathbb{P}} \text{Tr}((\overline{\Lambda} \hat{\rho}) \hat{A}) = \frac{1}{m!} \sum_{\pi \in \mathbb{P}} \text{Tr}(\hat{\rho} \hat{A}) = \text{Tr}(\hat{\rho} \hat{A}), \end{aligned}$$

where the third equality follows from Equation (5), and the last equality from the permutation invariance of  $\hat{\rho}$ . But then  $\underline{\Lambda}(\hat{A}) = \min\{\text{Tr}(\hat{\rho} \hat{A}) : \hat{\rho} \in \mathcal{R}_{\underline{\Lambda}}\} = 0$ , and similarly,  $\overline{\Lambda}(\hat{A}) = 0$ , since also  $-\hat{A} \in \mathcal{F}_{\text{pr}_{\text{ex}}}$ . Proposition 4(iii) now guarantees that  $\underline{\Lambda}$  is indeed exchangeable. ■

### Proof of Proposition 6

We give the proof for antisymmetric densities; the proof for symmetric densities is similar, but somewhat simpler.

For the first statement, sufficiency is proved in the main text, so we prove necessity. Assume that  $\hat{\rho}$  is antisymmetric. Since  $\hat{\rho}$  is Hermitian, it has a decomposition  $\hat{\rho} = \sum_{k=1}^n \lambda_k |a_k\rangle\langle a_k|$ , where the  $|a_k\rangle$  are its mutually orthonormal eigenstates and the  $\lambda_k$  its real eigenvalues [26, Box 2.2]. It then follows from Proposition 1 that  $\lambda_1, \dots, \lambda_n$  constitute a probability mass function over the eigenstates. We may assume without loss of generality that all  $\lambda_k > 0$ . Fix any  $|a_k\rangle$  and any  $\pi \in \mathbb{P}$ , then on the one hand it follows from the assumption that  $\hat{\rho}|a_k\rangle = \text{sgn}(\pi)\hat{I}_\pi\hat{\rho}|a_k\rangle = \lambda_k \text{sgn}(\pi)\hat{I}_\pi|a_k\rangle$ , and on the other hand we find that  $\hat{\rho}|a_k\rangle = \lambda_k|a_k\rangle$ . So  $|a_k\rangle = \text{sgn}(\pi)\hat{I}_\pi|a_k\rangle$ , and therefore  $|a_k\rangle$  is indeed antisymmetric.

The second statement follows from Ref. [26, Theorem 2.6] and the fact that, by Proposition 7,  $\mathcal{X}_a$  is a subspace of  $\mathcal{X}$ . The basic idea behind this argument is that Ref. [26, Theorem 2.6] guarantees that the state  $|\psi_k\rangle$  must be a linear combination of the eigenstates  $|a_1\rangle, \dots, |a_n\rangle$  corresponding to positive eigenvalues. The argument above confirms that those eigenstates  $|a_1\rangle, \dots, |a_n\rangle$  are antisymmetric, and since  $\mathcal{X}_a$  is a subspace of  $\mathcal{X}$ , the same holds for any linear combination of them, so indeed  $|\psi_k\rangle \in \mathcal{X}_a$ . ■

### Proof of Proposition 7

We begin by proving the first statement. Observe that, for any  $\pi \in \mathbb{P}$ ,  $\hat{I}_\pi\hat{P}_a = \hat{I}_\pi\frac{1}{m!}\sum_{\sigma \in \mathbb{P}} \text{sgn}(\sigma)\hat{I}_\sigma = \frac{1}{m!}\sum_{\sigma \in \mathbb{P}} \text{sgn}(\sigma)\hat{I}_{\sigma \circ \pi} = \text{sgn}(\pi)\hat{P}_a$ . Therefore  $\hat{P}_a\hat{P}_a = \frac{1}{m!}\sum_{\pi \in \mathbb{P}} \text{sgn}(\pi)\hat{I}_\pi\hat{P}_a = \frac{1}{m!}\sum_{\pi \in \mathbb{P}} \text{sgn}(\pi)^2\hat{P}_a = \hat{P}_a$ , and  $\hat{P}_s\hat{P}_a = \frac{1}{m!}\sum_{\pi \in \mathbb{P}} \hat{I}_\pi\hat{P}_a = \frac{1}{m!}\sum_{\pi \in \mathbb{P}} \text{sgn}(\pi)\hat{P}_a = \hat{0}$ . The proofs for  $\hat{P}_s\hat{P}_s = \hat{P}_s$  and  $\hat{P}_a\hat{P}_s = \hat{0}$  are very similar. It now follows at once that  $\hat{P}_o\hat{P}_o = (\hat{I} - \hat{P}_a - \hat{P}_s)(\hat{I} - \hat{P}_a - \hat{P}_s) = \hat{I} - \hat{P}_a - \hat{P}_s = \hat{P}_o$ , and that  $\hat{P}_o\hat{P}_s = (\hat{I} - \hat{P}_a - \hat{P}_s)\hat{P}_s = \hat{P}_s - \hat{P}_s = \hat{0}$ . The proofs for the remaining identities  $\hat{P}_s\hat{P}_o = \hat{P}_o\hat{P}_a = \hat{P}_a\hat{P}_o = \hat{0}$  are again very similar.

We now turn to the proof of the remaining statements. The identities in the first statement already allow us to conclude that  $\hat{P}_s$ ,  $\hat{P}_a$  and  $\hat{P}_o$  are projection operators that project onto mutually orthogonal spaces whose direct sum is the state space. We now prove that  $\hat{P}_a$  projects onto  $\mathcal{X}_a$ . For any  $|\psi\rangle \in \mathcal{X}_a$ ,  $\hat{P}_a|\psi\rangle = \frac{1}{m!}\sum_{\pi \in \mathbb{P}} \text{sgn}(\pi)\hat{I}_\pi|\psi\rangle = \frac{1}{m!}\sum_{\pi \in \mathbb{P}} \text{sgn}(\pi)^2|\psi\rangle = |\psi\rangle$ , so  $\mathcal{X}_a \subseteq \hat{P}_a\mathcal{X}$ . For the converse inclusion, we have that  $\hat{P}_a|\psi\rangle \in \mathcal{X}_a$  for any  $|\psi\rangle \in \mathcal{X}$ , since, as proved above,  $\hat{I}_\pi\hat{P}_a = \text{sgn}(\pi)\hat{P}_a$  and thus  $\text{sgn}(\pi)\hat{I}_\pi\hat{P}_a|\psi\rangle = \hat{P}_a|\psi\rangle$  for all  $\pi \in \mathbb{P}$ . Hence,  $\hat{P}_a\mathcal{X} \subseteq \mathcal{X}_a$ . We conclude that  $\hat{P}_a$  indeed projects onto  $\mathcal{X}_a$ . The proof that  $\hat{P}_s$  projects onto  $\mathcal{X}_s$  is very similar, and the rest of the proof is then immediate. ■

### Proof of Proposition 8

For all  $\pi \in \mathbb{P}$ ,  $\hat{I}_\pi$  is unitary, so  $\hat{\rho}\hat{I}_\pi = (\hat{I}_\pi\hat{\rho}\hat{I}_\pi^\dagger)\hat{I}_\pi = \hat{I}_\pi\hat{\rho}\hat{I}_\pi^\dagger\hat{I}_\pi = \hat{I}_\pi\hat{\rho}$ . Therefore,  $\hat{P}_s\hat{\rho} = \frac{1}{m!}\sum_{\pi \in \mathbb{P}} \hat{I}_\pi\hat{\rho} = \hat{\rho}\frac{1}{m!}\sum_{\pi \in \mathbb{P}} \hat{I}_\pi = \hat{\rho}\hat{P}_s$ . Similarly,  $\hat{P}_a\hat{\rho} = \hat{\rho}\hat{P}_a$  and therefore

$\hat{P}_o\hat{\rho} = (\hat{I} - \hat{P}_a - \hat{P}_s)\hat{\rho} = \hat{\rho}(\hat{I} - \hat{P}_a - \hat{P}_s) = \hat{\rho}\hat{P}_o$ . Now use Proposition 7 to find that, indeed,

$$\begin{aligned} \hat{\rho} &= \hat{\rho}(\hat{P}_o + \hat{P}_a + \hat{P}_s) = \hat{\rho}\hat{P}_o^2 + \hat{\rho}\hat{P}_a^2 + \hat{\rho}\hat{P}_s^2 \\ &= \hat{P}_o\hat{\rho}\hat{P}_o + \hat{P}_a\hat{\rho}\hat{P}_a + \hat{P}_s\hat{\rho}\hat{P}_s = \hat{\omega}_o + \hat{\omega}_a + \hat{\omega}_s. \end{aligned}$$

For the second statement, we'll only give a proof for antisymmetric densities. The proof for symmetric densities is similar, if somewhat simpler. For necessity, assume that  $\hat{\rho}$  is antisymmetric, so  $\hat{\rho} = \text{sgn}(\pi)\hat{I}_\pi\hat{\rho}$  for all  $\pi \in \mathbb{P}$ . Then

$$\hat{P}_a\hat{\rho} = \frac{1}{m!}\sum_{\pi \in \mathbb{P}} \text{sgn}(\pi)\hat{I}_\pi\hat{\rho} = \frac{1}{m!}\sum_{\pi \in \mathbb{P}} \hat{\rho} = \hat{\rho},$$

and similarly,  $\hat{\rho}\hat{P}_a = \hat{\rho}$ , and therefore, indeed,  $\hat{P}_a\hat{\rho}\hat{P}_a = \hat{\rho}\hat{P}_a = \hat{\rho}$ . For sufficiency, assume that  $\hat{P}_a\hat{\rho}\hat{P}_a = \hat{\rho}$ , and fix any  $\sigma \in \mathbb{P}$ . Observe that

$$\begin{aligned} \text{sgn}(\sigma)\hat{I}_\sigma\hat{P}_a &= \frac{1}{m!}\sum_{\pi \in \mathbb{P}} \text{sgn}(\sigma)\text{sgn}(\pi)\hat{I}_\sigma\hat{I}_\pi \\ &= \frac{1}{m!}\sum_{\pi \in \mathbb{P}} \text{sgn}(\pi)\hat{I}_\pi = \hat{P}_a, \end{aligned}$$

and therefore also

$$\text{sgn}(\sigma)\hat{I}_\sigma\hat{\rho} = \text{sgn}(\sigma)\hat{I}_\sigma\hat{P}_a\hat{\rho}\hat{P}_a = \hat{P}_a\hat{\rho}\hat{P}_a = \hat{\rho},$$

so we're done. ■

### Proof of Proposition 9

The first statement is an immediate consequence of the second, which itself follows readily from

$$\begin{aligned} \hat{I}_\pi^\dagger\hat{P}_\star &= \frac{1}{m!}\sum_{\sigma \in \mathbb{P}} \text{sgn}^\star(\sigma)\hat{I}_\pi^\dagger\hat{I}_\sigma \\ &= \text{sgn}^\star(\pi)\frac{1}{m!}\sum_{\sigma \in \mathbb{P}} \text{sgn}^\star(\sigma \circ \pi^{-1})\hat{I}_{\sigma \circ \pi^{-1}} \\ &= \text{sgn}^\star(\pi)\hat{P}_\star, \end{aligned} \tag{7}$$

and similarly,  $\hat{P}_\star\hat{I}_\pi = \text{sgn}^\star(\pi)\hat{P}_\star$ . For the last statement, consider any  $\hat{A} \in \mathcal{F}_{\text{pr}_\star}$ , then  $\hat{A} - \text{pr}_\star(\hat{A}) = \hat{A}$ . Now we use the definition of  $\text{pr}_\star$  to find that

$$\begin{aligned} &\hat{A} - \text{pr}_\star(\hat{A}) \\ &= \frac{1}{m!^2}\sum_{\pi, \sigma \in \mathbb{P}} \left[ \hat{A} - \text{sgn}^\star(\pi \circ \sigma)\hat{I}_\pi^\dagger\hat{A}\hat{I}_\sigma \right] \\ &= \frac{1}{m!^2}\sum_{\pi, \sigma \in \mathbb{P}} \left[ \hat{A} - \frac{\text{sgn}^\star(\pi \circ \sigma)}{2}(\hat{I}_\pi^\dagger\hat{A}\hat{I}_\sigma + \hat{I}_\sigma^\dagger\hat{A}\hat{I}_\pi) \right], \end{aligned}$$

where we reshuffled some terms to get the second equality. Consider that

$$2S_\sigma^*(S_\pi^*(\hat{A})) = \frac{\text{sgn}^*(\sigma \circ \pi)}{2} (\hat{I}_{\sigma \circ \pi}^\dagger \hat{A} + \hat{A} \hat{I}_{\sigma \circ \pi}^\dagger + \hat{I}_\sigma^\dagger \hat{A} \hat{I}_\pi + \hat{I}_\pi^\dagger \hat{A} \hat{I}_\sigma),$$

and therefore

$$\begin{aligned} \frac{\text{sgn}^*(\pi \circ \sigma)}{2} (\hat{I}_\pi^\dagger \hat{A} \hat{I}_\sigma + \hat{I}_\sigma^\dagger \hat{A} \hat{I}_\pi) \\ = 2S_\sigma^*(S_\pi^*(\hat{A})) - S_{\sigma \circ \pi}^*(\hat{A}), \end{aligned}$$

so a generic term in the sum above can be rewritten as

$$\begin{aligned} \hat{A} - \frac{\text{sgn}^*(\pi \circ \sigma)}{2} (\hat{I}_\pi^\dagger \hat{A} \hat{I}_\sigma + \hat{I}_\sigma^\dagger \hat{A} \hat{I}_\pi) \\ = 2[\hat{A} - S_\pi^*(\hat{A})] - [\hat{A} - S_{\sigma \circ \pi}^*(\hat{A})] + 2[S_\pi^*(\hat{A}) - S_{\sigma \circ \pi}^*(\hat{A})]. \end{aligned}$$

Each of the terms in brackets is an element of  $\mathcal{S}^*$ , so  $\hat{A} - \text{pr}_*(\hat{A})$  is a linear combination of elements of  $\mathcal{S}^*$ . Hence,  $\mathcal{S}_{\text{pr}_*} \subseteq \text{span}(\mathcal{S}^*)$ .

For the converse inclusion, consider any  $\hat{A} \in \mathcal{S}^*$ , so there are  $\hat{B} \in \mathcal{H}$  and  $\pi \in \mathbb{P}$  such that  $\hat{A} = \hat{B} - S_\pi^*(\hat{B})$ . Then

$$\text{pr}_*(\hat{A}) = \text{pr}_*(\hat{B} - S_\pi^*(\hat{B})) = \text{pr}_*(\hat{B}) - \text{pr}_*(S_\pi^*(\hat{B})) = \hat{0},$$

where the last equality holds because

$$\begin{aligned} \text{pr}_*(S_\pi^*(\hat{B})) &= \hat{P}_* \frac{\text{sgn}^*(\pi)}{2} (\hat{I}_\pi^\dagger \hat{B} + \hat{B} \hat{I}_\pi) \hat{P}_* \\ &= \frac{\text{sgn}^*(\pi)}{2} (\hat{P}_* \hat{I}_\pi^\dagger \hat{B} \hat{P}_* + \hat{P}_* \hat{B} \hat{I}_\pi \hat{P}_*) \\ &= \frac{\text{sgn}^*(\pi)^2}{2} (\hat{P}_* \hat{B} \hat{P}_* + \hat{P}_* \hat{B} \hat{P}_*) = \hat{P}_* \hat{B} \hat{P}_*, \end{aligned}$$

due to the Equation (7) and its right-sided counterpart, proved above. Hence,  $\hat{A} \in \mathcal{S}_{\text{pr}_*}$ , which implies that  $\mathcal{S}^* \subseteq \mathcal{S}_{\text{pr}_*}$  and therefore indeed also  $\text{span}(\mathcal{S}^*) \subseteq \mathcal{S}_{\text{pr}_*}$ . ■

The argumentation for proving of Propositions 10 and 11 is analogous to that in the proofs of Propositions 3 and 4, respectively, so we won't include them here.

### Proof of Corollary 12

Using a similar argument as in the proof of Corollary 5, we find that by Proposition 11, the strong  $\star$ -symmetry requirement is equivalent to the requirement that  $\text{Tr}(\hat{\rho} \hat{A}) = 0$  for all  $\hat{\rho} \in \mathcal{R}_\perp$  and all  $\hat{A} \in \mathcal{S}_{\text{pr}_*}$ , or equivalently, that

$$\text{Tr}(\hat{\rho}(\hat{A} - \text{pr}_*(\hat{A}))) = 0 \text{ for all } \hat{A} \in \mathcal{H}.$$

By the linearity and cyclic property of the trace, we can rewrite this condition, as

$$\text{Tr}(\hat{\rho} \hat{A}) = \text{Tr}(\hat{\rho} \hat{P}_* \hat{A} \hat{P}_*) = \text{Tr}(\hat{P}_* \hat{\rho} \hat{P}_* \hat{A}) \text{ for all } \hat{A} \in \mathcal{H},$$

and therefore, by Theorem 2, the strong  $\star$ -symmetry requirement is equivalent to

$$\hat{\rho} = \hat{P}_* \hat{\rho} \hat{P}_* = \text{pr}_*(\hat{\rho}) \text{ for all } \hat{\rho} \in \mathcal{R}_\perp. \quad (8)$$

To prove necessity for the first statement, observe that this condition, together with Proposition 9(ii), implies that  $\hat{\rho} = \text{sgn}^*(\pi) \hat{I}_\pi \hat{\rho}$  for all  $\pi \in \mathbb{P}$ , which is the stated condition.

For sufficiency, if the stated condition holds, then

$$\hat{P}_* \hat{\rho} = \frac{1}{m!} \sum_{\pi \in \mathbb{P}} \text{sgn}^*(\pi) \hat{I}_\pi \hat{\rho} = \text{sgn}^*(\pi)^2 \hat{\rho} = \hat{\rho},$$

and therefore,  $\hat{\rho} = \hat{\rho}^\dagger = (\hat{P}_* \hat{\rho})^\dagger = \hat{\rho}^\dagger \hat{P}_*^\dagger = \hat{\rho} \hat{P}_*$ , whence, indeed,  $\hat{\rho} = \hat{P}_* \hat{\rho} \hat{P}_*$ . ■

### Proof of Proposition 13

Assume that  $\hat{A} \in \mathcal{D}$ . Since

$$\text{pr}_*(\text{pr}_*(\hat{A}) - \hat{A}) = \text{pr}_*(\text{pr}_*(\hat{A})) - \text{pr}_*(\hat{A}) = \hat{0},$$

we see that  $\text{pr}_*(\hat{A}) - \hat{A} \in \mathcal{S}_{\text{pr}_*}$ , so the strong  $\star$ -symmetry of  $\mathcal{D}$  implies that  $\text{pr}_*(\hat{A}) = \hat{A} + (\text{pr}_*(\hat{A}) - \hat{A}) \in \mathcal{D}$ .

Conversely, assume that  $\text{pr}_*(\hat{A}) \in \mathcal{D}$ . Since, similarly as before,  $\hat{A} - \text{pr}_*(\hat{A}) \in \mathcal{S}_{\text{pr}_*}$ , the strong  $\star$ -symmetry of  $\mathcal{D}$  yields  $\hat{A} = \text{pr}_*(\hat{A}) + (\hat{A} - \text{pr}_*(\hat{A})) \in \mathcal{D}$ . ■

### Proof of Theorem 14

For sufficiency, assume that there's some coherent  $\mathcal{D}_o$  for  $\mathcal{X}_*$  such that  $\mathcal{D} = \{\hat{A} \in \mathcal{H} : \text{Hy}_*(\hat{A}) \in \mathcal{D}_o\}$ . First, we prove that  $\mathcal{D}$  is then coherent. For D1, assume that  $\hat{A} = \hat{0}$ , then also  $\text{Hy}_*(\hat{A}) = \hat{0}$  and therefore  $\text{Hy}_*(\hat{A}) \notin \mathcal{D}_o$ , so  $\hat{A} \notin \mathcal{D}$ . For D2, assume that  $\hat{A} > \hat{0}$ , then also  $\text{Hy}_*(\hat{A}) > \hat{0}$ <sup>15</sup> and therefore  $\text{Hy}_*(\hat{A}) \in \mathcal{D}_o$ , so  $\hat{A} \in \mathcal{D}$ . D3 and D4 follow from the linearity of  $\text{Hy}_*$ . Next, we show that  $\mathcal{D}$  is strongly  $\star$ -symmetric, using Proposition 10. Consider any  $\hat{A} \in \mathcal{D}$  and  $\hat{B} \in \mathcal{S}_{\text{pr}_*}$ , then we have to show that  $\hat{A} + \hat{B} \in \mathcal{D}$ . Since for all  $|\psi\rangle \in \mathcal{X}_*$ ,  $|\psi\rangle = \hat{P}_* |\psi\rangle$  and therefore also  $\langle \psi | \hat{B} | \psi \rangle = \langle \psi | \hat{P}_* \hat{B} \hat{P}_* | \psi \rangle = \langle \psi | \hat{0} | \psi \rangle = 0$ , we find that  $\text{Hy}_*(\hat{B}) = \hat{0}$ . Therefore  $\text{Hy}_*(\hat{A} + \hat{B}) = \text{Hy}_*(\hat{A}) \in \mathcal{D}_o$ , whence, indeed,  $\hat{A} + \hat{B} \in \mathcal{D}$ . Finally, consider any  $\hat{C} \in \mathcal{H}(\mathcal{X}_*)$  and observe that for all  $|\psi\rangle \in \mathcal{X}_*$ ,  $\langle \psi | \text{ext}_*(\hat{C}) | \psi \rangle = \langle \psi | \hat{C} \hat{P}_* | \psi \rangle = \langle \psi | \hat{C} | \psi \rangle$ , so  $\text{Hy}_*(\text{ext}_*(\hat{C})) = \hat{C}$ , and therefore indeed,

$$\text{ext}_*(\hat{C}) \in \mathcal{D} \Leftrightarrow \text{Hy}_*(\text{ext}_*(\hat{C})) \in \mathcal{D}_o \Leftrightarrow \hat{C} \in \mathcal{D}_o.$$

For necessity, assume that  $\mathcal{D}$  is a strongly  $\star$ -symmetric coherent set of desirable measurements for  $\mathcal{X}$ , then we first prove that  $\mathcal{D}_*$  is a coherent set of desirable measurements for  $\mathcal{X}_*$ . For D1, since  $\text{ext}_*(\hat{0}) = \hat{0}$  and  $\hat{0} \notin \mathcal{D}$ , we find that  $\hat{0} \notin \mathcal{D}_*$ . For D2, consider any  $\hat{C} \in \mathcal{H}(\mathcal{X}_*)_{>\hat{0}}$  and let

<sup>15</sup>A Hermitian operator  $\hat{A}$  on a Hilbert space  $\mathcal{X}$  is positive definite if and only if  $\langle \psi | \hat{A} | \psi \rangle > 0$  for all  $|\psi\rangle \in \mathcal{X}$ .

$\hat{A} := \text{ext}_\star(\hat{C}) + \hat{I} - \hat{P}_\star$ . As the codomain of  $\mathcal{E}(\hat{C}) = \hat{C}\hat{P}_\star$  is  $\mathcal{X}_\star$ , we find that  $\hat{C}\hat{P}_\star = \hat{P}_\star\hat{C}\hat{P}_\star$ . Then for all  $|\psi\rangle \in \tilde{\mathcal{X}}$ ,

$$\begin{aligned} \langle \psi | \hat{A} | \psi \rangle &= \langle \psi | (\hat{P}_\star \hat{C} \hat{P}_\star + \hat{I} - \hat{P}_\star) | \psi \rangle \\ &= \langle \psi | \hat{P}_\star \hat{C} \hat{P}_\star | \psi \rangle + 1 - \langle \psi | \hat{P}_\star | \psi \rangle. \end{aligned}$$

Now, there are two possibilities, for any  $|\psi\rangle \in \tilde{\mathcal{X}}$ . If  $\hat{P}_\star|\psi\rangle \neq 0$ , then the positivity of  $\hat{C}$  implies that  $\langle \psi | \hat{P}_\star \hat{C} \hat{P}_\star | \psi \rangle > 0$  and  $1 - \langle \psi | \hat{P}_\star | \psi \rangle \geq 0$ , because the eigenvalues of the projector  $\hat{P}_\star$  are 0 and 1. If  $\hat{P}_\star|\psi\rangle = 0$ , then  $\langle \psi | \hat{P}_\star \hat{C} \hat{P}_\star | \psi \rangle = 0$  and  $1 - \langle \psi | \hat{P}_\star | \psi \rangle = 1 > 0$ . This tells us that  $\hat{A} > \hat{0}$ , and therefore  $\hat{A} \in \mathcal{D}$ . But, as  $\hat{P}_\star$  is a projection operator,

$$\begin{aligned} \text{pr}_\star(\hat{A}) &= \hat{P}_\star(\text{ext}_\star(\hat{C}) + \hat{I} - \hat{P}_\star)\hat{P}_\star \\ &= \hat{P}_\star \text{ext}_\star(\hat{C})\hat{P}_\star + \hat{P}_\star\hat{P}_\star - \hat{P}_\star\hat{P}_\star\hat{P}_\star \\ &= \hat{P}_\star\hat{C}\hat{P}_\star\hat{P}_\star = \hat{P}_\star\hat{C}\hat{P}_\star = \hat{C}\hat{P}_\star = \text{ext}_\star(\hat{C}), \end{aligned}$$

where the penultimate equality follows from the fact that the codomain of  $\hat{C}$  is  $\mathcal{X}_\star$ . But then Proposition 13 guarantees that  $\text{pr}_\star(\hat{A}) = \text{ext}_\star(\hat{C})$  also belongs to  $\mathcal{D}$ , so indeed  $\hat{C} \in \mathcal{D}_\star$ . D3 and D4, follow from the linearity of  $\text{ext}_\star$ . To conclude, we prove that  $\mathcal{D} = \{\hat{A} \in \mathcal{H} : \text{Hy}_\star(\hat{A}) \in \mathcal{D}_\star\}$ . Consider any  $\hat{A} \in \mathcal{H}$  and observe that  $\text{ext}_\star(\text{Hy}_\star(\hat{A})) = \text{pr}_\star(\hat{A})$ , so

$$\begin{aligned} \hat{A} \in \mathcal{D} &\Leftrightarrow \text{pr}_\star(\hat{A}) \in \mathcal{D} \Leftrightarrow \text{ext}_\star(\text{Hy}_\star(\hat{A})) \in \mathcal{D} \\ &\Leftrightarrow \text{Hy}_\star(\hat{A}) \in \mathcal{D}_\star, \end{aligned}$$

where the first equivalence follows from Proposition 13. ■
